# Supplementary material
Source: MDPI journal article supplement (https://www.mdpi.com/2073-4441/14/16/2493)
Supplement: s1 [file s1]

## Supplementary Information

# Assessment of Glucocorticoid Removal by UVA/Chlorination and Ozonation: Performance Comparison in Kinetics, Degradation Pathway, and Toxicity

Ai Zhang <sup>1</sup>, Xinyuan Jiang <sup>1</sup>, Qiancheng Wang <sup>1</sup>, Siyu Hao <sup>1</sup>, Dahai Zhu <sup>1</sup>, Jie Wang <sup>2,\*</sup>, Ce Wang <sup>3</sup> and Mingyan Liu <sup>4</sup>

<sup>1</sup> College of Environmental Science and Engineering, Donghua University, 2999 North Renmin Road, Shanghai 201620, China

<sup>2</sup> Fishery Machinery and Instrument Research Institute of Chinese Academy of Fishery Sciences, 63 Chifeng Road, Shanghai 200092, China

<sup>3</sup> Shanghai Zhuoyuan Water-Ecological Environmental Engineering Co., Ltd., Shanghai 200003, China

<sup>4</sup> China Tiegong Investment & Construction Group Co., Ltd., Beijing 101399, China

\* Correspondence: wangjie4545@126.com; Tel./Fax: +86-021-67792538

**Table S1.** Available data on measured concentrations of FA, TA, and CP in various environmental samples.

| Glucocorticoid                 | Type of samples     | Country     | Concentration (ng/L) | Ref. |
|--------------------------------|---------------------|-------------|----------------------|------|
| Triamcinolone acetonide        | Hospital wastewater | Netherlands | 14–41                | [4]  |
| Fluocinolone acetonide         | Surface water       | USA         | 0.19 ± 0.15          | [19] |
| Triamcinolone acetonide        | Surface water       | USA         | 9.00±0.18            | [19] |
| Clobetasol propionate          | Surface water       | USA         | 0.64 ± 0.16          | [19] |
| Fluocinolone acetonide         | Surface water       | Germany     | <0.05–1.0            | [20] |
| Triamcinolone acetonide        | Surface water       | Germany     | 0.05–12              | [20] |
| Clobetasol propionate          | Surface water       | Germany     | <0.02–3.4            | [20] |
| Fluocinolone acetonide acetate | Surface water       | Italian     | 0.3–1.2              | [21] |
| Fluocinolone acetonide acetate | Urban wastewater    | Italian     | 2.3                  | [21] |
| Triamcinolone acetonide        | Surface water       | Italian     | 0.9–2.6              | [21] |
| Triamcinolone acetonide        | Urban wastewater    | Italian     | 6.4                  | [21] |
| Triamcinolone acetonide        | Hospital wastewater | Switzerland | 14                   | [22] |
| Triamcinolone acetonide        | Surface water       | Switzerland | <1                   | [22] |
| Clobetasol propionate          | Hospital wastewater | Switzerland | 7                    | [22] |
| Clobetasol propionate          | Surface water       | Switzerland | <1                   | [22] |
| Triamcinolone acetonide        | Surface water       | Hungary     | <0.63                | [23] |

**Table S2-1.** Pseudo-first-order kinetic models and corresponding  $R^2$  of GCs under different light intensities during UVA/chlorination.

| parameter |                        | Rate constants<br>( $k$ ; $h^{-1}$ ) | coefficients of determination ( $R^2$ ) |
|-----------|------------------------|--------------------------------------|-----------------------------------------|
| FA        | 180 mW/cm <sup>2</sup> | 0.16096                              | 0.99763                                 |
|           | 220 mW/cm <sup>2</sup> | 0.18302                              | 0.99558                                 |
|           | 250 mW/cm <sup>2</sup> | 0.21747                              | 0.99306                                 |
|           | 280 mW/cm <sup>2</sup> | 0.31851                              | 0.98601                                 |
| TA        | 180 mW/cm <sup>2</sup> | 0.16852                              | 0.99467                                 |
|           | 220 mW/cm <sup>2</sup> | 0.18961                              | 0.99775                                 |

|    |                        |         |         |
|----|------------------------|---------|---------|
| CP | 250 mW/cm <sup>2</sup> | 0.25434 | 0.99441 |
|    | 280 mW/cm <sup>2</sup> | 0.33204 | 0.99085 |
|    | 180 mW/cm <sup>2</sup> | 0.16623 | 0.98153 |
|    | 220 mW/cm <sup>2</sup> | 0.22465 | 0.87598 |
|    | 250 mW/cm <sup>2</sup> | 0.20964 | 0.88711 |
|    | 280 mW/cm <sup>2</sup> | 0.23123 | 0.88929 |

**Table S2-2.** Pseudo-first-order kinetic models and corresponding  $R^2$  of GCs under different chlorine dosages during UVA/chlorination.

| parameter |          | Rate constants<br>(k; h <sup>-1</sup> ) | coefficients of determination ( $R^2$ ) |
|-----------|----------|-----------------------------------------|-----------------------------------------|
| FA        | 0 mg/L   | 0.16096                                 | 0.99763                                 |
|           | 2.5 mg/L | 0.15703                                 | 0.99426                                 |
|           | 5 mg/L   | 0.18197                                 | 0.99827                                 |
|           | 10 mg/L  | 0.16191                                 | 0.99824                                 |
|           | 20 mg/L  | 0.15237                                 | 0.99747                                 |
| TA        | 0 mg/L   | 0.16779                                 | 0.96715                                 |
|           | 2.5 mg/L | 0.19296                                 | 0.98740                                 |
|           | 5 mg/L   | 0.22276                                 | 0.98554                                 |
|           | 10 mg/L  | 0.21048                                 | 0.89792                                 |
|           | 20 mg/L  | 0.19172                                 | 0.98884                                 |
| CP        | 0 mg/L   | 0.16852                                 | 0.99467                                 |
|           | 2.5 mg/L | 0.17728                                 | 0.99584                                 |
|           | 5 mg/L   | 0.19545                                 | 0.99516                                 |
|           | 10 mg/L  | 0.18491                                 | 0.99913                                 |
|           | 20 mg/L  | 0.16903                                 | 0.99629                                 |

**Table S3-1.** Pseudo-first-order kinetic models and corresponding  $R^2$  of GCs under different O<sub>3</sub> dosages during ozonation.

| parameter |         | Rate constants<br>(k; min <sup>-1</sup> ) | coefficients of determination ( $R^2$ ) |
|-----------|---------|-------------------------------------------|-----------------------------------------|
| FA        | 19 mg/L | 0.05140                                   | 0.99703                                 |
|           | 31 mg/L | 0.02348                                   | 0.99142                                 |
|           | 38 mg/L | 0.02774                                   | 0.92409                                 |
|           | 59 mg/L | 0.03527                                   | 0.94070                                 |
|           | 67 mg/L | 0.03170                                   | 0.85893                                 |
| TA        | 19 mg/L | 0.11706                                   | 0.99206                                 |
|           | 31 mg/L | 0.03904                                   | 0.97076                                 |
|           | 38 mg/L | 0.03421                                   | 0.89608                                 |
|           | 59 mg/L | 0.04009                                   | 0.87522                                 |
|           | 67 mg/L | 0.04225                                   | 0.80473                                 |
| CP        | 19 mg/L | 0.13286                                   | 0.98912                                 |
|           | 31 mg/L | 0.03213                                   | 0.98839                                 |
|           | 38 mg/L | 0.03011                                   | 0.92646                                 |
|           | 59 mg/L | 0.03843                                   | 0.89267                                 |
|           | 67 mg/L | 0.04687                                   | 0.81886                                 |

**Table S3-2.** Pseudo-first-order kinetic models and corresponding  $R^2$  of GCs under different initial pH values during ozonation.

| parameter |     | Rate constants<br>( $k$ ; $\text{min}^{-1}$ ) | coefficients of determination ( $R^2$ ) |
|-----------|-----|-----------------------------------------------|-----------------------------------------|
| FA        | 4   | 0.11914                                       | 0.98616                                 |
|           | 5   | 0.01835                                       | 0.86718                                 |
|           | 6.2 | 0.00913                                       | 0.88802                                 |
|           | 7.7 | 0.01240                                       | 0.97747                                 |
| TA        | 4   | 0.21968                                       | 0.89827                                 |
|           | 5   | 0.02187                                       | 0.96061                                 |
|           | 6.2 | 0.01416                                       | 0.88335                                 |
|           | 7.7 | 0.01571                                       | 0.97318                                 |
| CP        | 4   | 0.27527                                       | 0.94872                                 |
|           | 5   | 0.02909                                       | 0.93142                                 |
|           | 6.2 | 0.01489                                       | 0.89591                                 |
|           | 7.7 | 0.02321                                       | 0.97886                                 |

**Table S4-1.** General information of identified transformation products of FA during UVA/chlorination.

| Product              | Species | m/z      | Molecular formula                                             | Relative molecular weight | Diff (ppm) |
|----------------------|---------|----------|---------------------------------------------------------------|---------------------------|------------|
| FA-P <sub>394</sub>  | (M-H)-  | 393.1507 | C <sub>21</sub> H <sub>27</sub> FO <sub>6</sub>               | 394.1592                  | 1.62       |
| FA-P <sub>432a</sub> | (M-H)-  | 431.1866 | C <sub>21</sub> H <sub>30</sub> F <sub>2</sub> O <sub>7</sub> | 432.196                   | 2.58       |
| FA-P <sub>432b</sub> | (M-H)-  | 431.1869 | C <sub>24</sub> H <sub>29</sub> FO <sub>6</sub>               | 432.1948                  | 1.85       |
| FA-P <sub>448a</sub> | (M-H)-  | 447.2019 | C <sub>21</sub> H <sub>33</sub> FO <sub>9</sub>               | 448.2097                  | 2.83       |
| FA-P <sub>448b</sub> | (M-H)-  | 447.2019 | C <sub>24</sub> H <sub>32</sub> O <sub>8</sub>                | 448.2097                  | 1.28       |
| FA-P <sub>450a</sub> | (M-H)-  | 449.1974 | C <sub>21</sub> H <sub>32</sub> F <sub>2</sub> O <sub>8</sub> | 450.2065                  | 2.99       |
| FA-P <sub>450b</sub> | (M-H)-  | 449.1985 | C <sub>24</sub> H <sub>31</sub> FO <sub>7</sub>               | 450.2054                  | -0.57      |
| FA-P <sub>470</sub>  | (M-H)-  | 469.2034 | C <sub>24</sub> H <sub>32</sub> F <sub>2</sub> O <sub>7</sub> | 470.2116                  | 2.26       |
| FA-P <sub>486</sub>  | (M-H)-  | 485.1763 | C <sub>24</sub> H <sub>32</sub> ClFO <sub>7</sub>             | 486.1821                  | 1.9        |
| FA-P <sub>502</sub>  | (M-H)-  | 501.1697 | C <sub>24</sub> H <sub>32</sub> ClFO <sub>8</sub>             | 502.177                   | -0.09      |
| FA-P <sub>504</sub>  | (M-H)-  | 503.1854 | C <sub>24</sub> H <sub>34</sub> ClFO <sub>8</sub>             | 504.1926                  | 0.82       |

**Table S4-2.** General information of identified transformation products of TA during UVA/chlorination.

| Product             | Species | m/z      | Molecular formula                                 | Relative molecular weight | Diff (ppm) |
|---------------------|---------|----------|---------------------------------------------------|---------------------------|------------|
| TA-P <sub>358</sub> | (M-H)-  | 357.1499 | C <sub>21</sub> H <sub>23</sub> FO <sub>4</sub>   | 358.158                   | 1.97       |
| TA-P <sub>365</sub> | (M-H)-  | 355.1551 | C <sub>21</sub> H <sub>24</sub> O <sub>5</sub>    | 365.1624                  | 0.04       |
| TA-P <sub>465</sub> | (M-H)-  | 455.2026 | C <sub>23</sub> H <sub>33</sub> FO <sub>8</sub>   | 465.2159                  | 2.95       |
| TA-P <sub>476</sub> | (M-H)-  | 475.2014 | C <sub>23</sub> H <sub>37</sub> ClO <sub>8</sub>  | 476.2177                  | 0          |
| TA-P <sub>506</sub> | (M-H)-  | 505.1848 | C <sub>23</sub> H <sub>35</sub> ClO <sub>10</sub> | 506.1919                  | -0.36      |

**Table S4-3.** General information of identified transformation products of CP during UVA/ chlorination.

| Product              | Species | m/z      | Molecular formula                                              | Relative molecular weight | Diff (ppm) |
|----------------------|---------|----------|----------------------------------------------------------------|---------------------------|------------|
| CP-P <sub>464</sub>  | (M-H)-  | 463.1881 | C <sub>22</sub> H <sub>34</sub> ClFO <sub>7</sub>              | 464.1977                  | 2.37       |
| CP-P <sub>468</sub>  | (M-H)-  | 467.1981 | C <sub>25</sub> H <sub>34</sub> ClFO <sub>5</sub>              | 468.2079                  | 2.8        |
| CP-P <sub>470</sub>  | (M-H)-  | 469.2243 | C <sub>24</sub> H <sub>35</sub> FO <sub>8</sub>                | 470.2316                  | -0.06      |
| CP-P <sub>482a</sub> | (M-H)-  | 481.1772 | C <sub>22</sub> H <sub>36</sub> Cl <sub>2</sub> O <sub>7</sub> | 482.1838                  | -2.84      |
| CP-P <sub>482b</sub> | (M-H)-  | 481.1781 | C <sub>25</sub> H <sub>32</sub> ClFO <sub>6</sub>              | 482.1871                  | 1.65       |
| CP-P <sub>484</sub>  | (M-H)-  | 484.1948 | C <sub>25</sub> H <sub>34</sub> ClFO <sub>6</sub>              | 484.2028                  | 2.98       |
| CP-P <sub>502</sub>  | (M-H)-  | 501.1429 | C <sub>24</sub> H <sub>32</sub> Cl <sub>2</sub> O <sub>7</sub> | 502.1525                  | 2.29       |
| CP-P <sub>510</sub>  | (M-H)-  | 509.1740 | C <sub>23</sub> H <sub>36</sub> Cl <sub>2</sub> O <sub>8</sub> | 510.1787                  | -2.93      |
| CP-P <sub>512</sub>  | (M-H)-  | 511.1893 | C <sub>23</sub> H <sub>38</sub> Cl <sub>2</sub> O <sub>8</sub> | 512.1944                  | -2.76      |

**Table S5-1.** General information of identified transformation products of FA during ozonation.

| Product              | Species | m/z      | Molecular formula                                             | Relative molecular weight | Diff (ppm) |
|----------------------|---------|----------|---------------------------------------------------------------|---------------------------|------------|
| FA-P <sub>382a</sub> | (M-H)-  | 381.1709 | C <sub>20</sub> H <sub>27</sub> FO <sub>6</sub>               | 382.1792                  | 2.11       |
| FA-P <sub>382b</sub> | (M-H)-  | 381.1707 | C <sub>23</sub> H <sub>26</sub> O <sub>5</sub>                | 382.178                   | 0.42       |
| FA-P <sub>400</sub>  | (M-H)-  | 399.1819 | C <sub>20</sub> H <sub>29</sub> FO <sub>7</sub>               | 400.1897                  | 1.14       |
| FA-P <sub>406</sub>  | (M-H)-  | 405.1709 | C <sub>22</sub> H <sub>27</sub> FO <sub>6</sub>               | 406.1792                  | 1.39       |
| FA-P <sub>410</sub>  | (M-H)-  | 409.1667 | C <sub>21</sub> H <sub>27</sub> FO <sub>7</sub>               | 410.1741                  | 0.58       |
| FA-P <sub>432</sub>  | (M-H)-  | 431.1867 | C <sub>21</sub> H <sub>30</sub> F <sub>2</sub> O <sub>7</sub> | 432.196                   | 2.45       |
| FA-P <sub>442</sub>  | (M-H)-  | 441.1737 | C <sub>22</sub> H <sub>28</sub> F <sub>2</sub> O <sub>7</sub> | 442.1803                  | -1.5       |
| FA-P <sub>464</sub>  | (M-H)-  | 463.1778 | C <sub>21</sub> H <sub>30</sub> F <sub>2</sub> O <sub>9</sub> | 464.1858                  | 1.12       |
| FA-P <sub>414</sub>  | (M-H)-  | 413.1602 | C <sub>23</sub> H <sub>26</sub> O <sub>7</sub>                | 414.1679                  | 1.71       |
| FA-P <sub>416</sub>  | (M-H)-  | 415.1757 | C <sub>23</sub> H <sub>28</sub> O <sub>7</sub>                | 416.1835                  | 1.36       |
| FA-P <sub>424</sub>  | (M-H)-  | 423.1816 | C <sub>22</sub> H <sub>29</sub> FO <sub>7</sub>               | 424.1897                  | 2.28       |
| FA-P <sub>434</sub>  | (M-H)-  | 433.1671 | C <sub>20</sub> H <sub>28</sub> F <sub>2</sub> O <sub>8</sub> | 434.1752                  | 2.17       |
| FA-P <sub>436</sub>  | (M-H)-  | 435.1757 | C <sub>23</sub> H <sub>29</sub> FO <sub>7</sub>               | 436.1898                  | 0.62       |
| FA-P <sub>438</sub>  | (M-H)-  | 437.1766 | C <sub>23</sub> H <sub>28</sub> F <sub>2</sub> O <sub>6</sub> | 438.1854                  | 2.9        |
| FA-P <sub>472</sub>  | (M-H)-  | 471.1836 | C <sub>23</sub> H <sub>30</sub> F <sub>2</sub> O <sub>8</sub> | 472.1909                  | 0.07       |

**Table S5-2.** General information of identified transformation products of TA during ozonation.

| Product              | Species | m/z      | Molecular formula                                | Relative molecular weight | Diff (ppm) |
|----------------------|---------|----------|--------------------------------------------------|---------------------------|------------|
| TA-P <sub>396</sub>  | (M-H)-  | 395.1508 | C <sub>20</sub> H <sub>25</sub> FO <sub>7</sub>  | 396.1584                  | 0.88       |
| TA-P <sub>422</sub>  | (M-H)-  | 421.1865 | C <sub>22</sub> H <sub>30</sub> O <sub>8</sub>   | 422.1941                  | 0.58       |
| TA-P <sub>424</sub>  | (M-H)-  | 423.2015 | C <sub>22</sub> H <sub>32</sub> O <sub>8</sub>   | 424.2097                  | 1.9        |
| TA-P <sub>430</sub>  | (M-H)-  | 429.1901 | C <sub>24</sub> H <sub>30</sub> O <sub>7</sub>   | 430.1992                  | 2.45       |
| TA-P <sub>432a</sub> | (M-H)-  | 431.2074 | C <sub>21</sub> H <sub>33</sub> FO <sub>8</sub>  | 432.2159                  | 2.73       |
| TA-P <sub>432b</sub> | (M-H)-  | 431.2087 | C <sub>24</sub> H <sub>32</sub> O <sub>7</sub>   | 432.2148                  | -1.54      |
| TA-P <sub>442</sub>  | (M-H)-  | 441.1930 | C <sub>22</sub> H <sub>31</sub> FO <sub>8</sub>  | 442.2003                  | 0.09       |
| TA-P <sub>448a</sub> | (M-H)-  | 447.2020 | C <sub>21</sub> H <sub>33</sub> FO <sub>9</sub>  | 448.2109                  | 2.89       |
| TA-P <sub>448b</sub> | (M-H)-  | 447.2022 | C <sub>24</sub> H <sub>32</sub> O <sub>8</sub>   | 448.2097                  | 0.54       |
| TA-P <sub>458</sub>  | (M-H)-  | 457.1865 | C <sub>22</sub> H <sub>31</sub> FO <sub>9</sub>  | 458.1952                  | 2.99       |
| TA-P <sub>476</sub>  | (M-H)-  | 475.1971 | C <sub>22</sub> H <sub>33</sub> FO <sub>10</sub> | 476.2058                  | 1.45       |
| TA-P <sub>460</sub>  | (M-H)-  | 459.2020 | C <sub>22</sub> H <sub>33</sub> FO <sub>9</sub>  | 460.2190                  | 2.82       |
| TA-P <sub>484</sub>  | (M-H)-  | 483.2032 | C <sub>24</sub> H <sub>33</sub> FO <sub>9</sub>  | 484.2109                  | 0.38       |
| TA-P <sub>488</sub>  | (M-H)-  | 487.1982 | C <sub>23</sub> H <sub>33</sub> FO <sub>10</sub> | 488.2058                  | 0.9        |

**Table S5-3.** General information of identified transformation products of CP during ozonation.

| Product             | Species | m/z      | Molecular formula                                 | Relative molecular weight | Diff (ppm) |
|---------------------|---------|----------|---------------------------------------------------|---------------------------|------------|
| CP-P <sub>412</sub> | (M-H)-  | 411.1576 | C <sub>21</sub> H <sub>29</sub> ClO <sub>6</sub>  | 412.1653                  | 1.54       |
| CP-P <sub>424</sub> | (M-H)-  | 423.1570 | C <sub>22</sub> H <sub>29</sub> ClO <sub>6</sub>  | 424.1653                  | 0.67       |
| CP-P <sub>428</sub> | (M-H)-  | 427.1531 | C <sub>21</sub> H <sub>29</sub> ClO <sub>7</sub>  | 428.1602                  | 0.64       |
| CP-P <sub>432</sub> | (M-H)-  | 431.1623 | C <sub>24</sub> H <sub>29</sub> ClO <sub>5</sub>  | 432.1704                  | -0.25      |
| CP-P <sub>440</sub> | (M-H)-  | 439.1519 | C <sub>22</sub> H <sub>29</sub> ClO <sub>7</sub>  | 440.1602                  | 4.46       |
| CP-P <sub>444</sub> | (M-H)-  | 443.1621 | C <sub>22</sub> H <sub>30</sub> ClFO <sub>6</sub> | 444.1715                  | 2.73       |
| CP-P <sub>466</sub> | (M-H)-  | 465.1675 | C <sub>24</sub> H <sub>31</sub> ClO <sub>7</sub>  | 466.1758                  | 3.62       |
| CP-P <sub>486</sub> | (M-H)-  | 485.1743 | C <sub>24</sub> H <sub>32</sub> ClFO <sub>7</sub> | 486.1821                  | 1.32       |
| CP-P <sub>490</sub> | (M-H)-  | 489.1684 | C <sub>23</sub> H <sub>32</sub> ClFO <sub>8</sub> | 490.177                   | 3.05       |
| CP-P <sub>515</sub> | (M-H)-  | 514.1534 | C <sub>25</sub> H <sub>32</sub> ClFO <sub>8</sub> | 515.1832                  | 3.46       |
| CP-P <sub>498</sub> | (M-H)-  | 497.1742 | C <sub>25</sub> H <sub>32</sub> ClFO <sub>7</sub> | 498.1821                  | 0.96       |
| CP-P <sub>502</sub> | (M-H)-  | 501.1691 | C <sub>24</sub> H <sub>32</sub> ClFO <sub>8</sub> | 502.177                   | 2.44       |

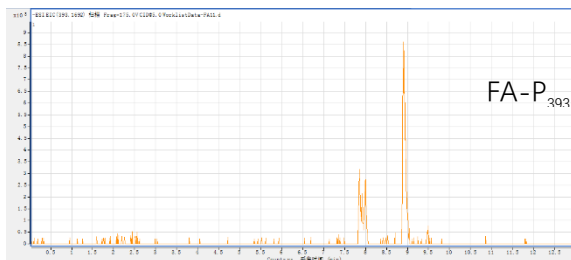

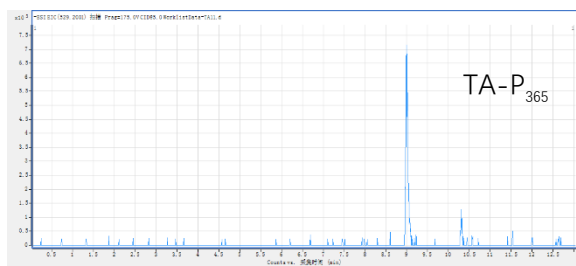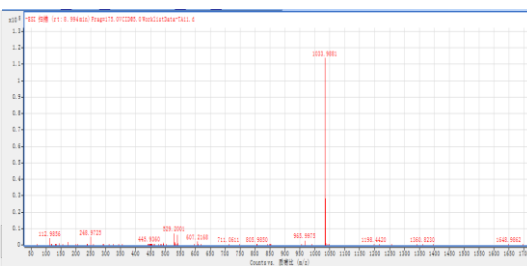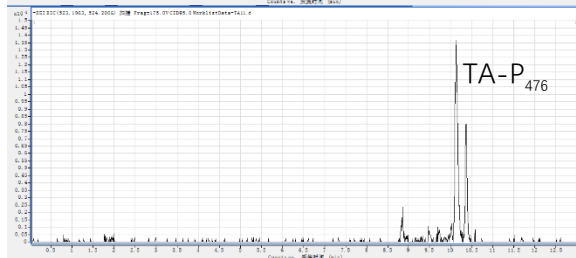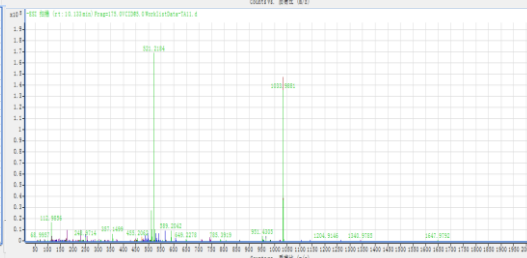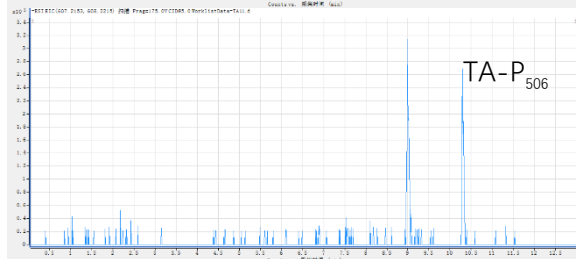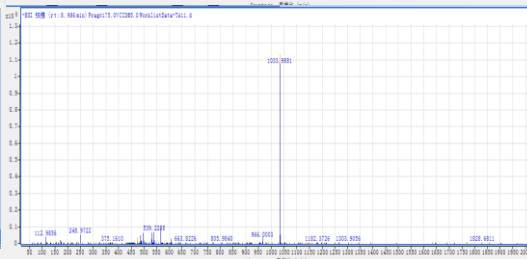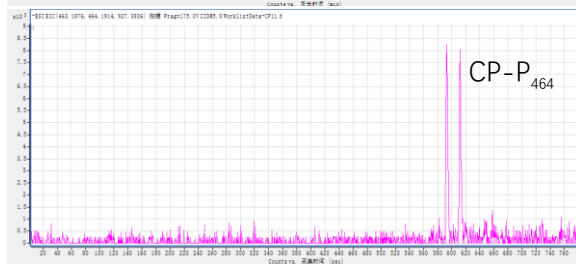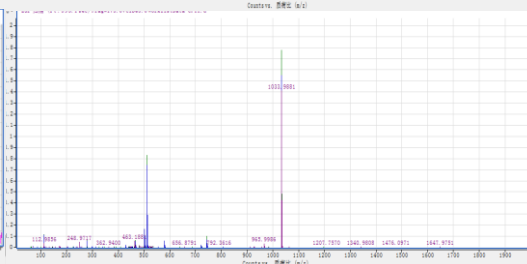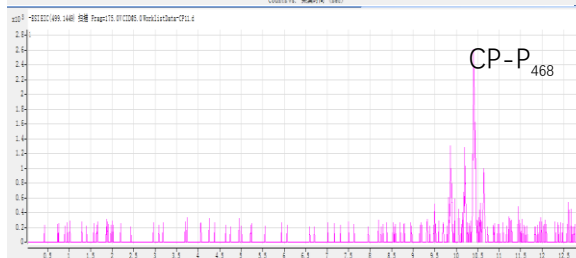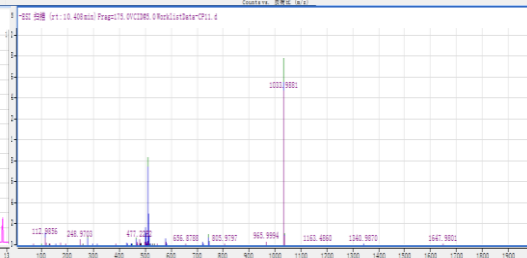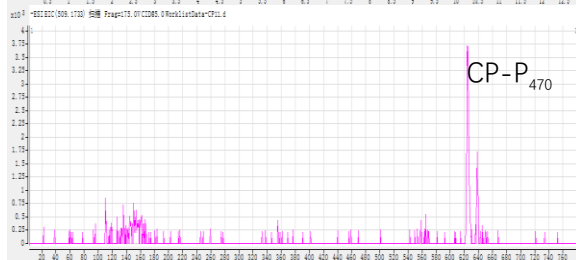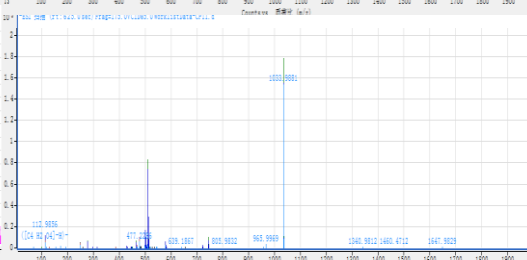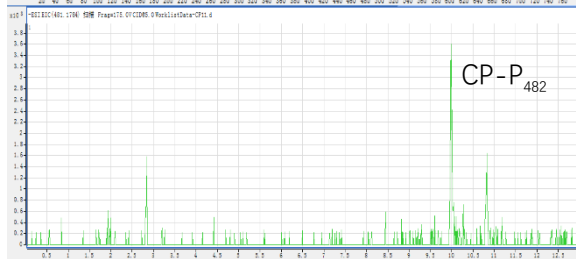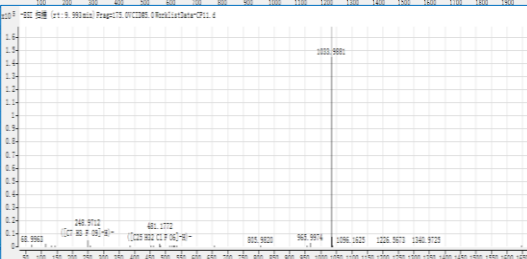

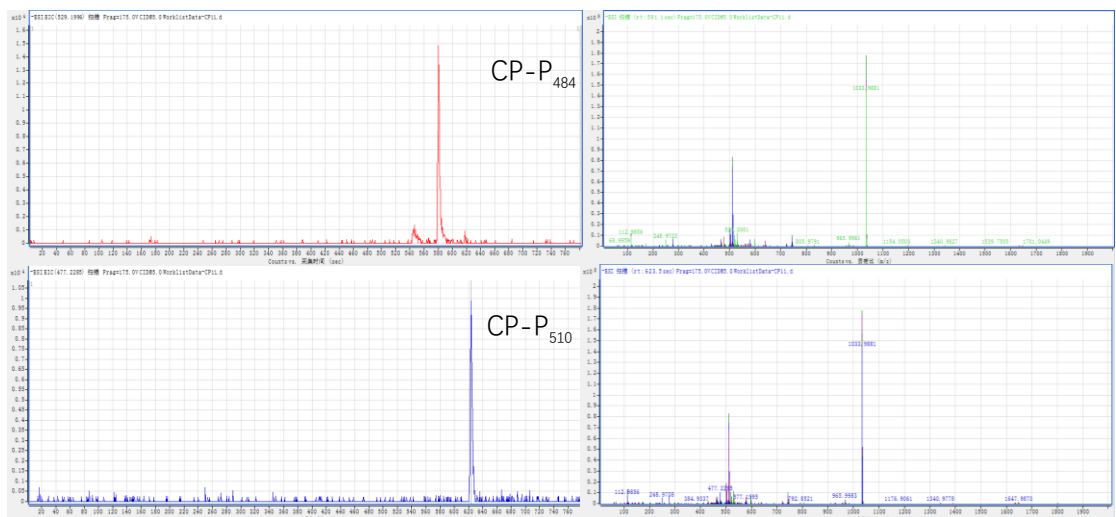

**Figure S1-1.** Extracted ion chromatographs and mass spectrometry fragments for intermediates of GCs during UVA/chlorination.

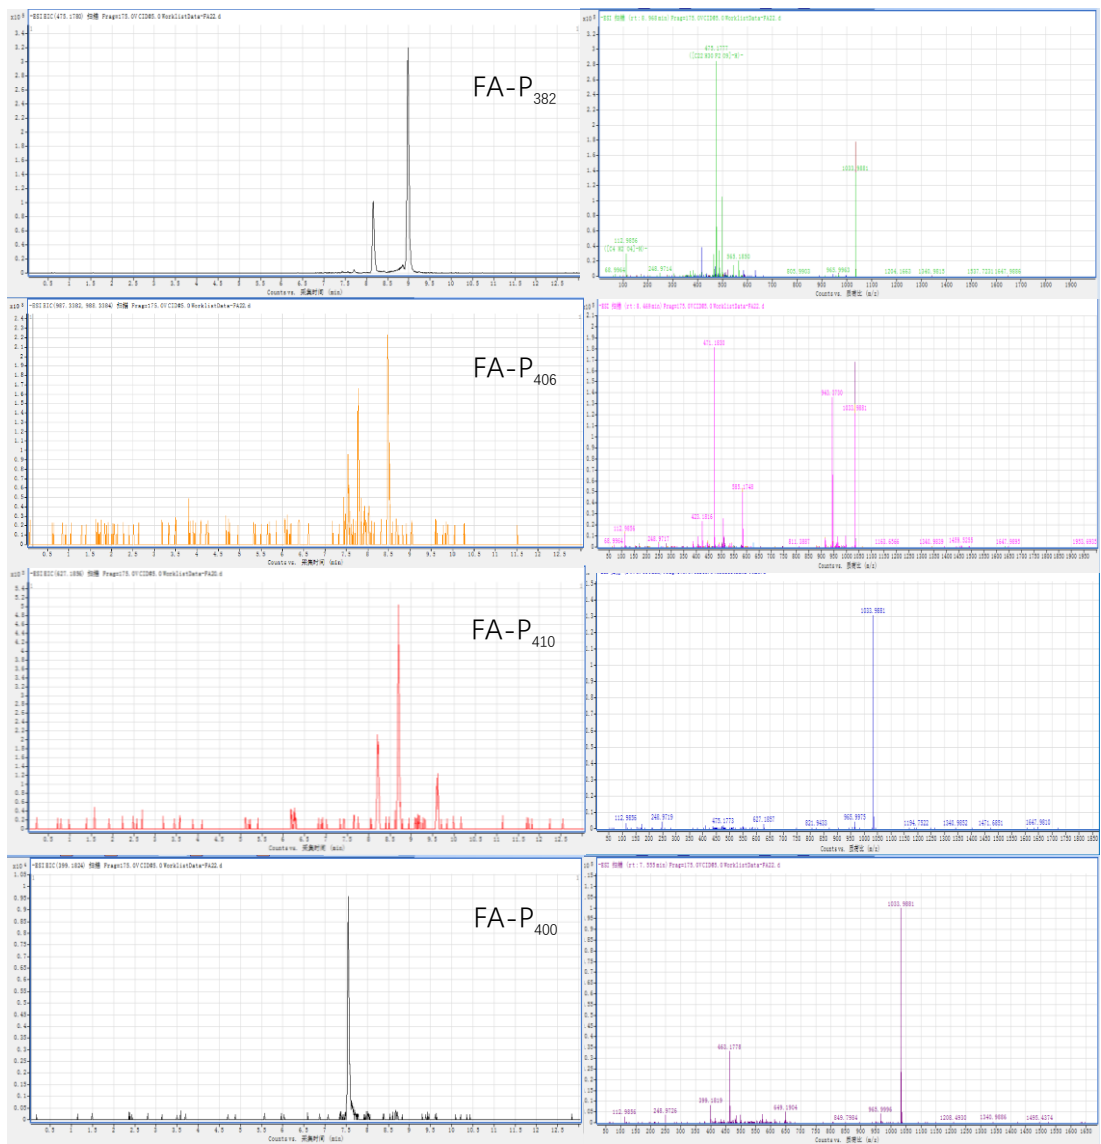

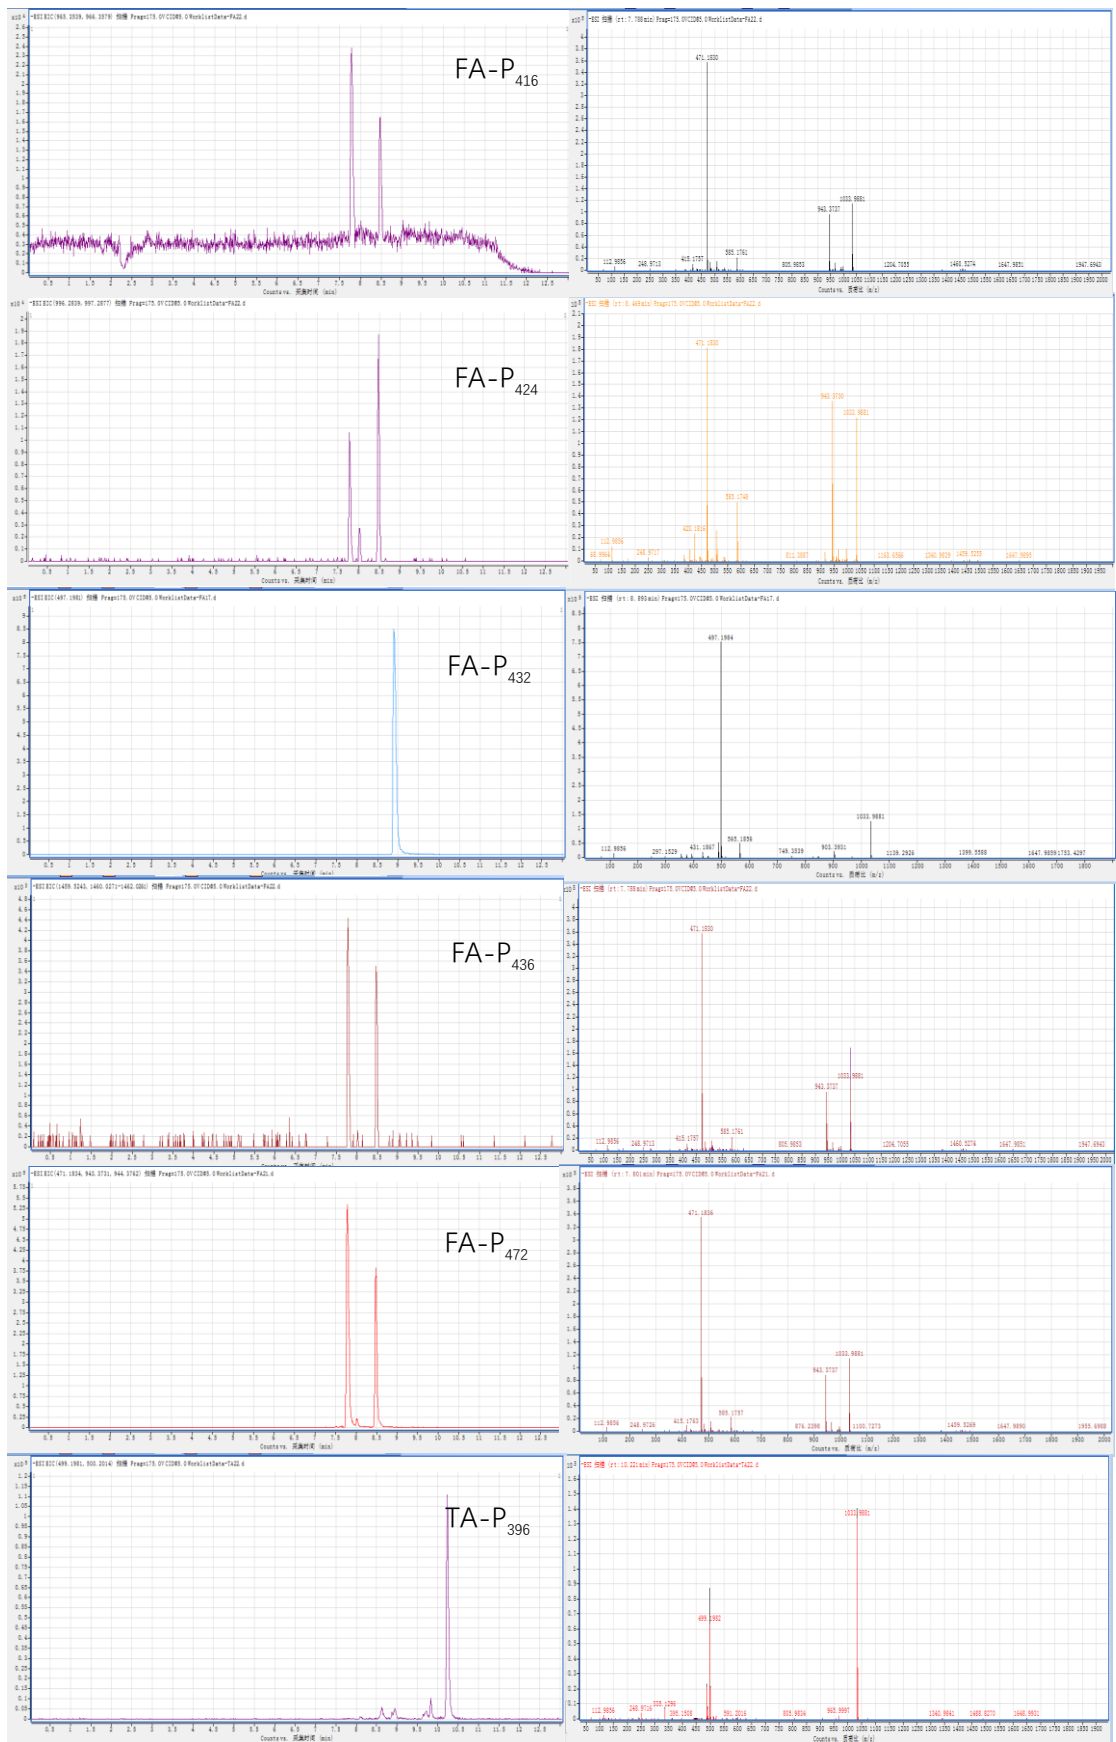



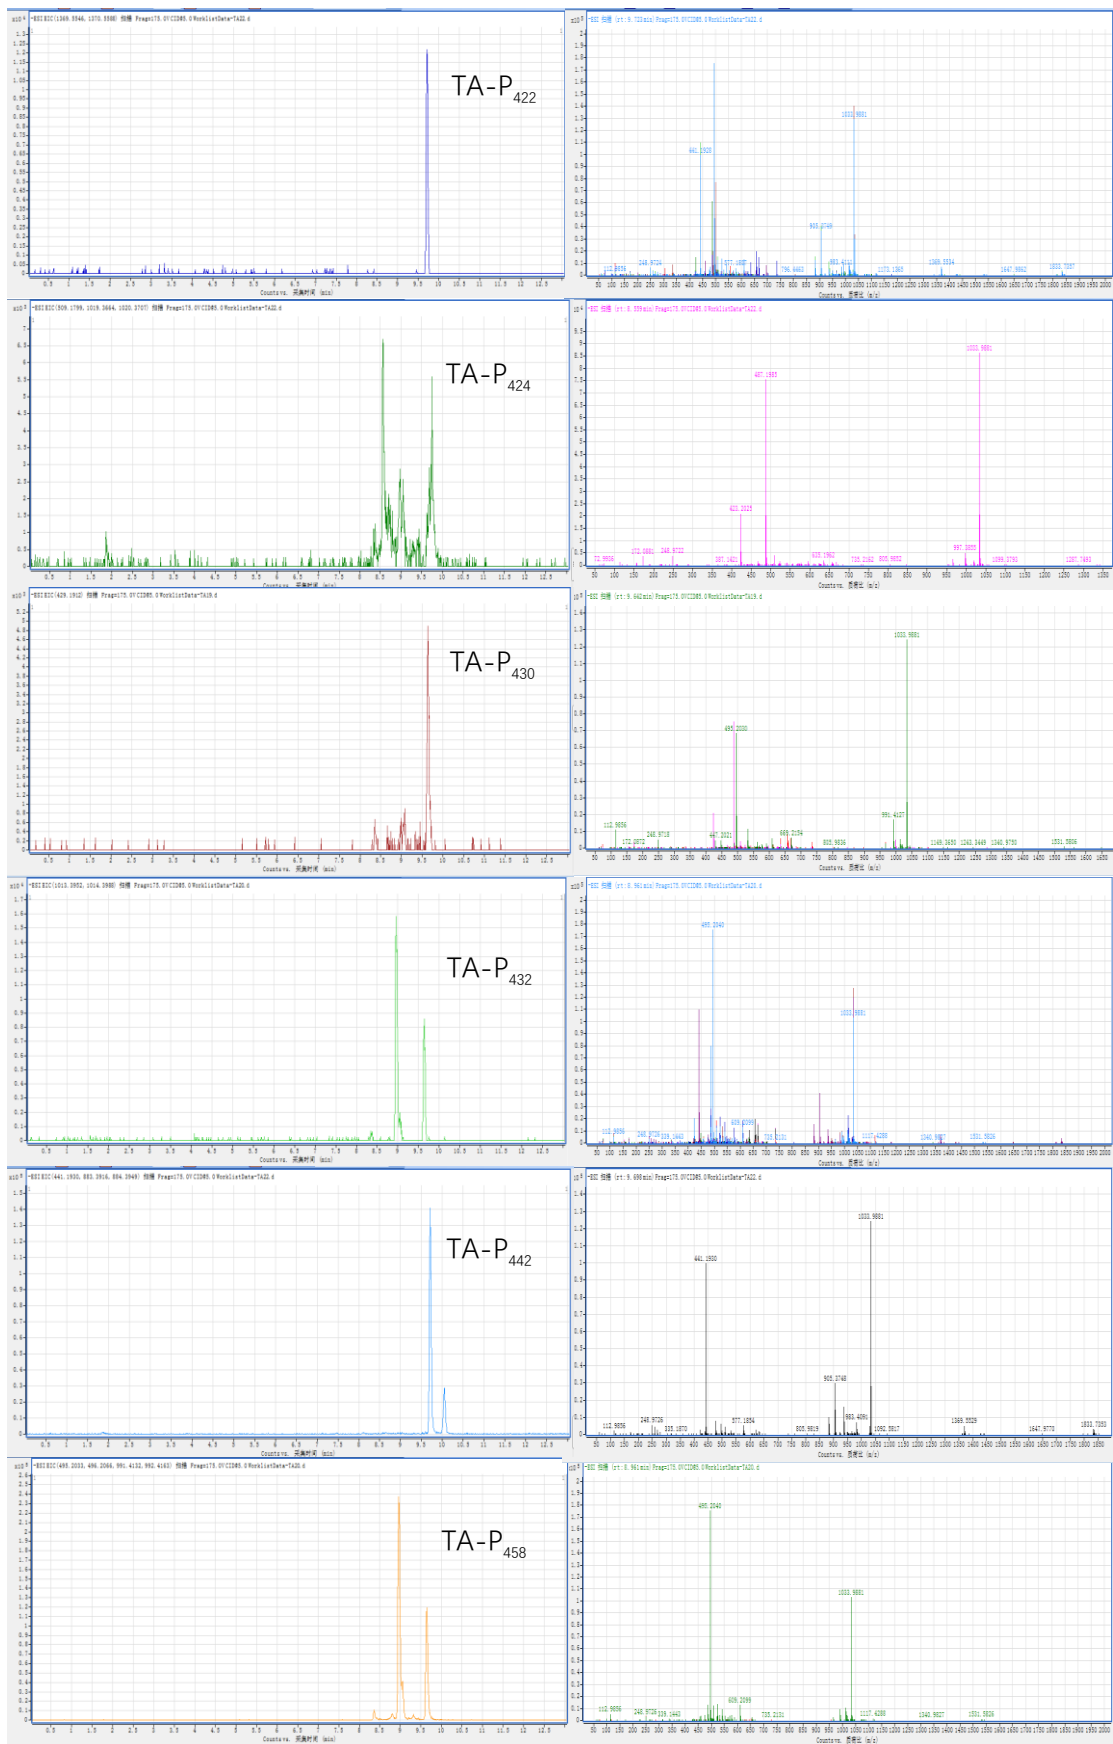

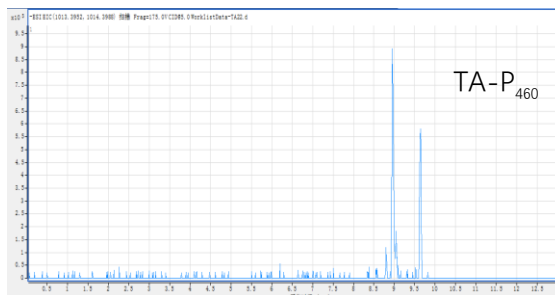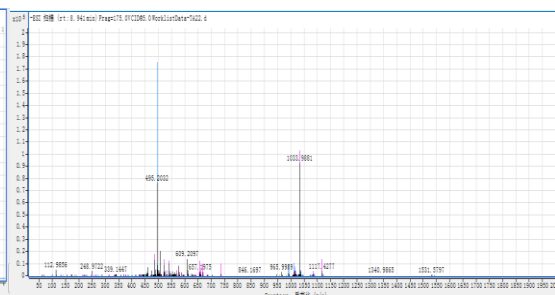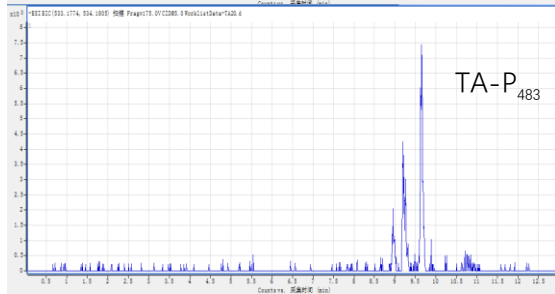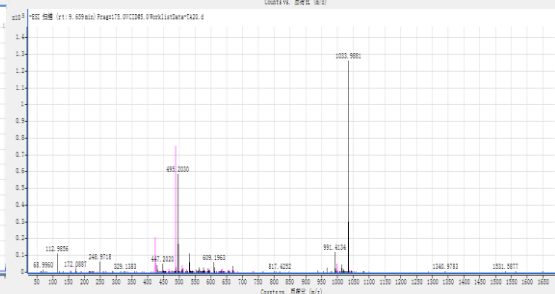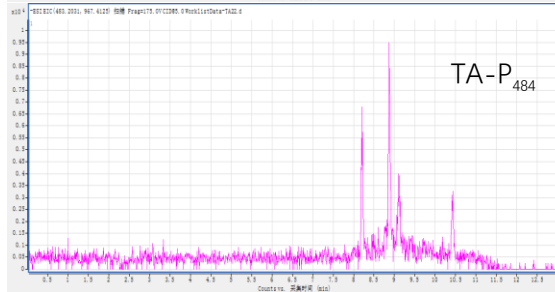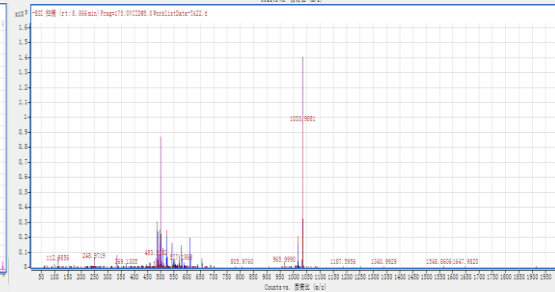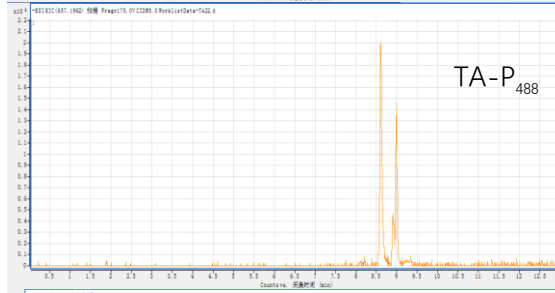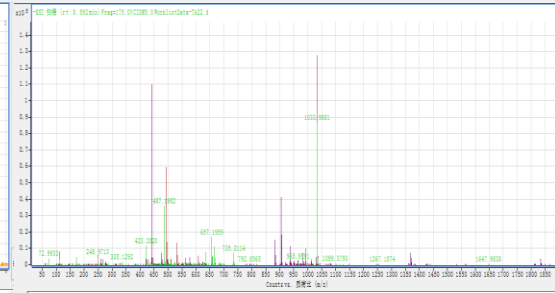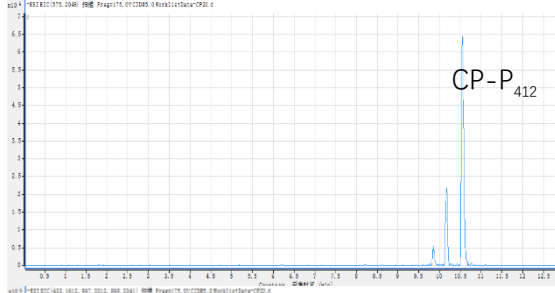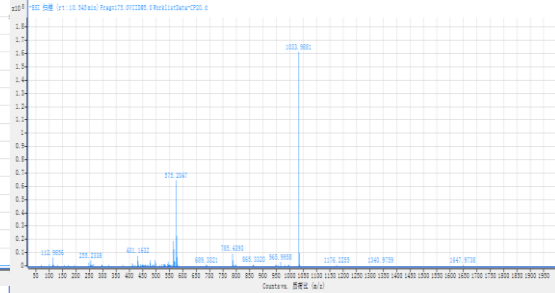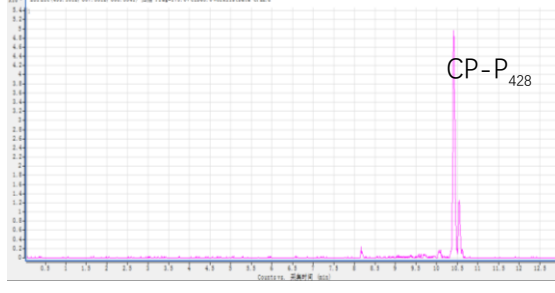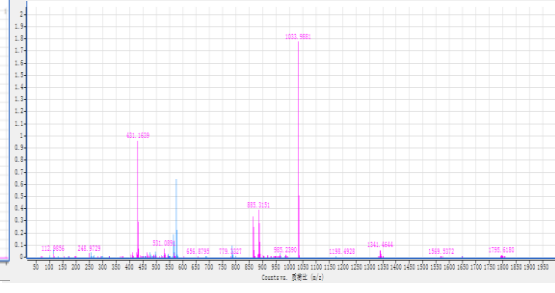

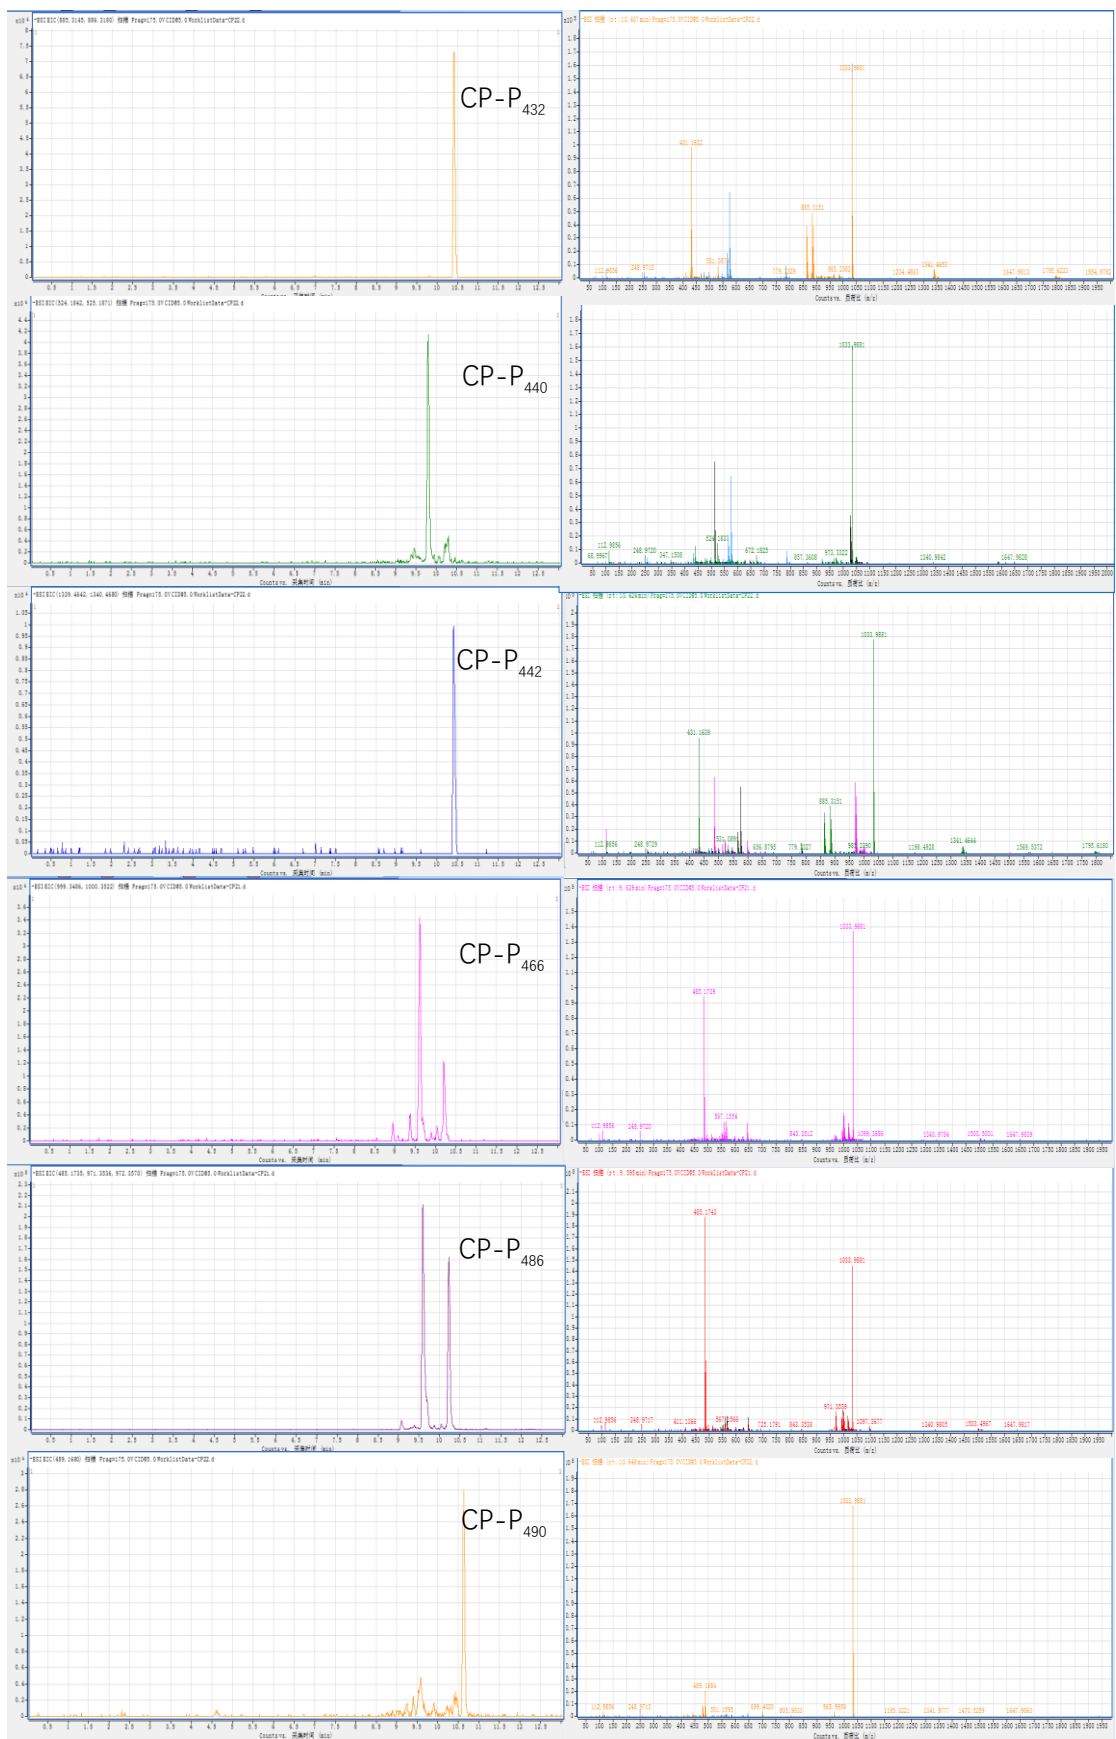

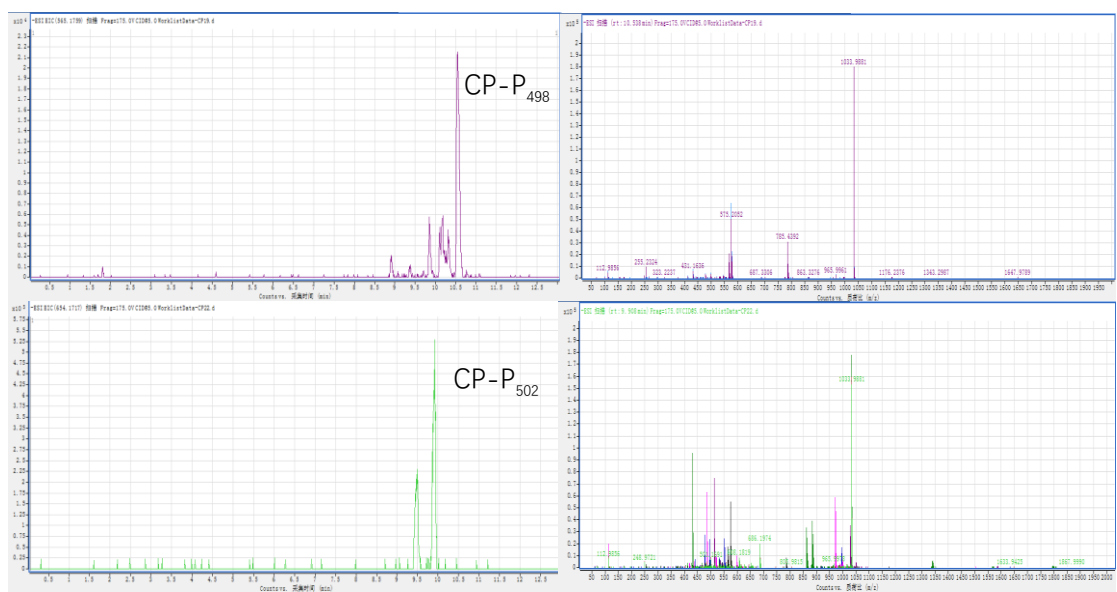

**Figure S1.-2** Extracted ion chromatographs and mass spectrometry fragments for intermediates of GCs during ozonation.

## References

1. Schriks, M.; van Leerdam, J.A.; van der Linden, S.C.; van der Burg, B.; van Wezel, A.P.; de Voogt, P. High-Resolution Mass Spectrometric Identification and Quantification of Glucocorticoid Compounds in Various Wastewaters in The Netherlands. *Environ. Sci. Technol.* **2010**, *44*, 4766–4774. <https://doi.org/10.1021/es100013x>.
2. Wu, S.; Jia, A.; Daniels, K.D.; Park, M.; Snyder, S.A. Trace analysis of corticosteroids (CSs) in environmental waters by liquid chromatography-tandem mass spectrometry. *Talanta* **2019**, *195*, 830–840. <https://doi.org/10.1016/j.talanta.2018.11.113>.
3. Weizel, A.; Schluesener, M.P.; Dierkes, G.; Ternes, T.A. Occurrence of Glucocorticoids, Mineralocorticoids, and Progestogens in Various Treated Wastewater, Rivers, and Streams. *Environ. Sci. Technol.* **2018**, *52*, 5296–5307. <https://doi.org/10.1021/acs.est.7b06147>.
4. Speltini, A.; Merlo, F.; Maraschi, F.; Sturini, M.; Contini, M.; Calisi, N.; Profumo, A. Thermally condensed humic acids onto silica as SPE for effective enrichment of glucocorticoids from environmental waters followed by HPLC-HESI-MS/MS. *J. Chromatogr. A* **2018**, *1540*, 38–46. <https://doi.org/10.1016/j.chroma.2018.02.004>.
5. Ammann, A.A.; Macikova, P.; Groh, K.J.; Schirmer, K.; Suter, M.J.F. LC-MS/MS determination of potential endocrine disruptors of cortico signalling in rivers and wastewaters (vol 406, pg 7653, 2014). *Anal. Bioanal. Chem.* **2016**, *408*, 4821–4822. <https://doi.org/10.1007/s00216-016-9581-1>.
6. Tolgyesi, A.; Verebey, Z.; Sharma, V.K.; Kovacsics, L.; Fekete, J. Simultaneous determination of corticosteroids, androgens, and progesterone in river water by liquid chromatography-tandem mass spectrometry. *Chemosphere* **2010**, *78*, 972–979. <https://doi.org/10.1016/j.chemosphere.2009.12.025>.
